# Supplementary material for: Occurrence and temporal distribution of extended-spectrum β-lactamase-producing Escherichia coli in clams from the Central Adriatic, Italy
Source: Frontiers journal article supplement (doi:10.3389/fmicb.2023.1219008), 2023-11-06
Supplement: Data_Sheet_1.zip [file Data_Sheet_1.zip]

## Appendix 2. Supplementary material and methods.

### Sampling areas

Sampling points were chosen from north to south of the Marche region coast, which is approximately 180 km long. The 28 sampling points were distributed along the coast from north to south of the region as follows: 5 in province of Pesaro-Urbino, 18 in the province of Ancona, 2 in the province of Macerata and 3 in the province of Fermo. In the region, populated or densely populated areas are present along the coast and there are eight hydrographic basins, areas of territory identified by the presence of a basin of a main river.

**Table 2.**

**List of antibiotics tested in the disk diffusion susceptibility tests.**

| Antibiotics                    | Antibiotic abbreviation and concentration |
|--------------------------------|-------------------------------------------|
| Ampicillin                     | AMP 10 µg                                 |
| Cefotaxime                     | CTX 30 µg,                                |
| Cefoxitin                      | FOX 30 µg,                                |
| Chloramphenicol                | C 30 µg                                   |
| Ciprofloxacin                  | CIP 5 µg                                  |
| Gentamicin                     | CN 10 µg                                  |
| Nalidixic acid                 | NA 30 µg                                  |
| Tetracycline                   | TE 30 µg                                  |
| Sulfamethoxazole /trimethoprim | SXT 25 µg                                 |
